# Supplementary material for: Green fabrication of a complementary electrochromic device using water-based ink containing nanoparticles of WO3 and Prussian blue
Source: Royal Society of Chemistry journal article supplement (doi:10.1039/c9ra09153j), 2020-01-01
Supplement: c9ra09153j1.pdf [file c9ra09153j1.pdf]

## Supplementary information

### **Green fabrication of a complementary electrochromic device using water-based ink containing nanoparticles of WO<sub>3</sub> and Prussian blue**

Kazuki Tajima<sup>\*a</sup>, Hiroshi Watanabe<sup>a</sup>, Mizuka Nishino<sup>a</sup>, and Tohru Kawamoto<sup>\*a</sup>

a.Nanomaterial Research Institute, National Institute of Advanced Industrial Science and Technology (AIST), 1-1-1 Higashi, Tsukuba 305-8565, Japan

\*Corresponding Author:

E-mail: k-tajima@aist.go.jp, tohru.kawamoto@aist.go.jp

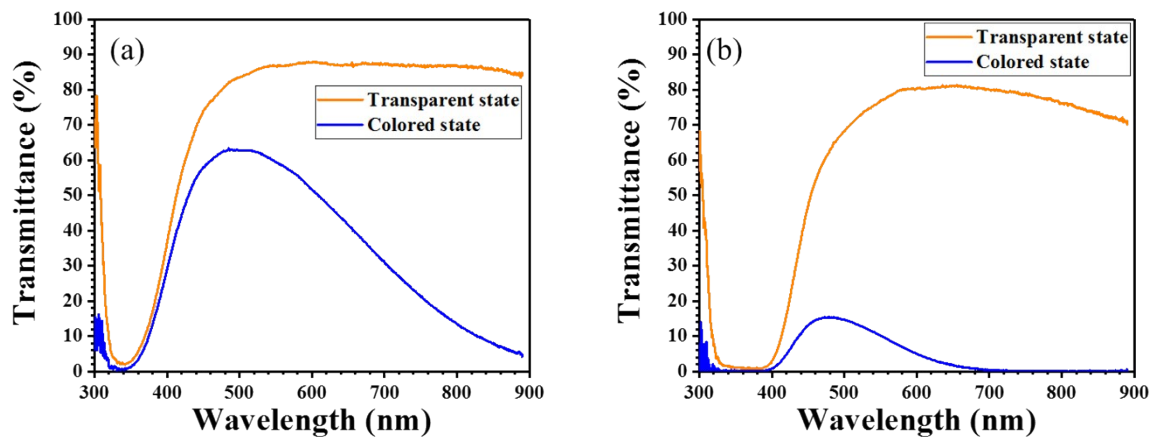

[Figure S1]

Figure S1 Change in electrochromic transmittance of  $\text{WO}_3$  film on ITO/glass.

(a) Thin film deposited by spin-coating at 500 rpm for 30 s, and (b) thick film generated in this work after thermal treatment at 500 °C for 1 h.

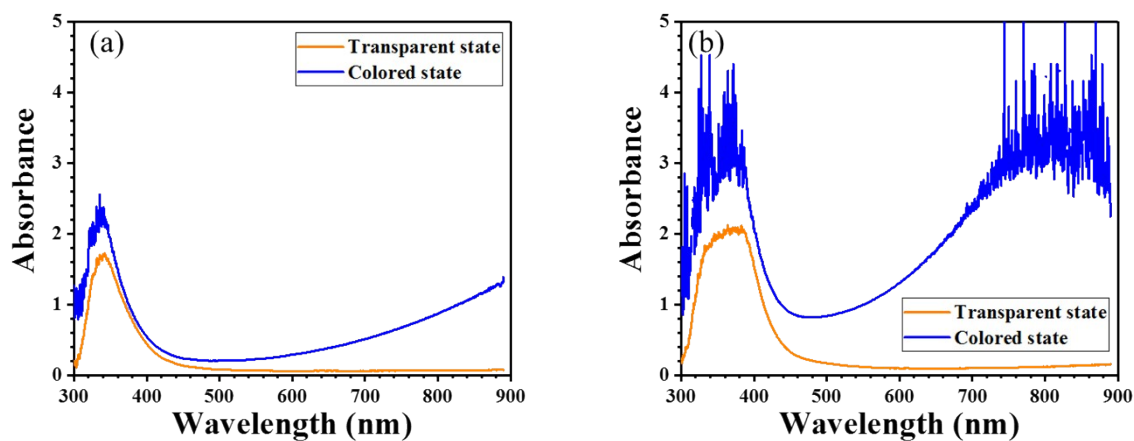

[Figure S2]

Figure S2 Change in electrochromic absorbance of  $\text{WO}_3$  film on ITO/glass.

(a) Thin film deposited by spin-coating at 500 rpm for 30 s, and (b) thick film generated in this work after thermal treatment at 500 °C for 1 h.

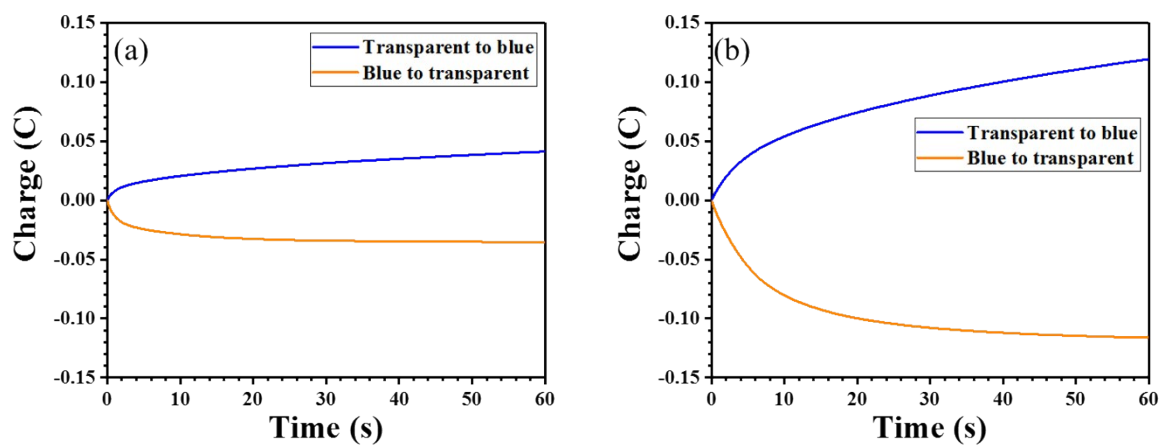

[Figure S3]

Figure S3 Multiple potential step measurements of WO<sub>3</sub> film on ITO/glass.

(a) Thin film deposited by spin-coating at 500 rpm for 30 s, and (b) thick film generated in this work after thermal treatment at 500 °C for 1 h.

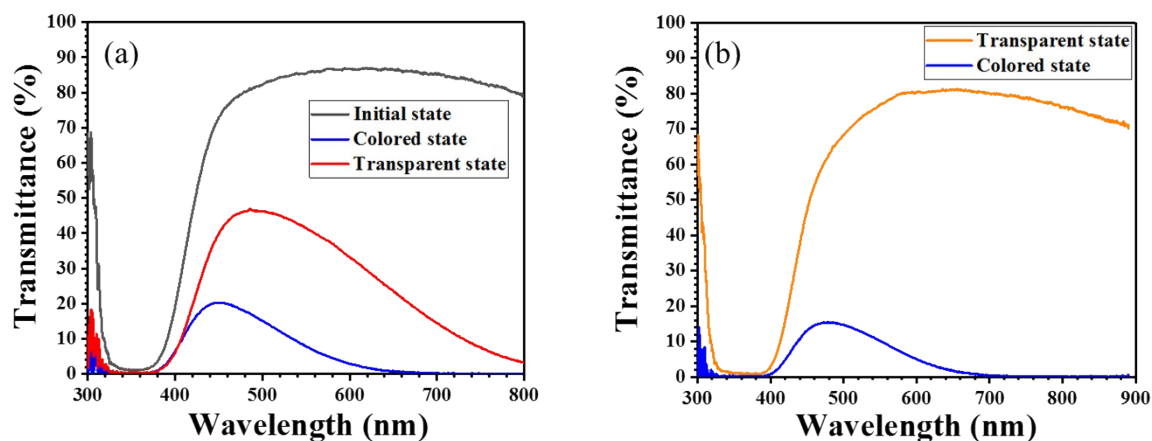

[Figure S4]

Figure S4 Change in electrochromic transmittance of WO<sub>3</sub> thick film on ITO/glass. (a) As-prepared (not thermally treated), and (b) after thermal treatment at 500 °C for 1 h.

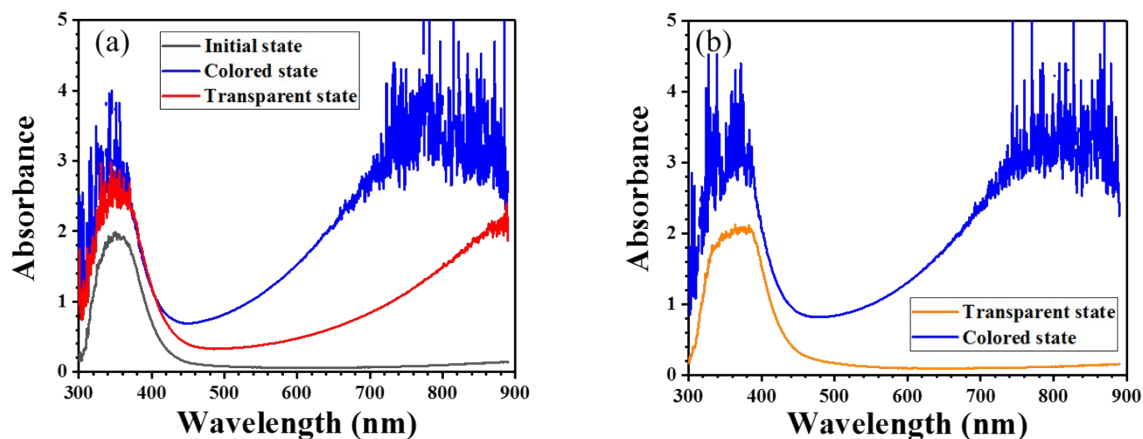

**[Figure S5]**

Figure S5 Change in electrochromic absorbance of  $\text{WO}_3$  thick film on ITO/glass. (a) As-prepared (not thermally treated), and (b) after thermal treatment at  $500\text{ }^\circ\text{C}$  for 1 h.

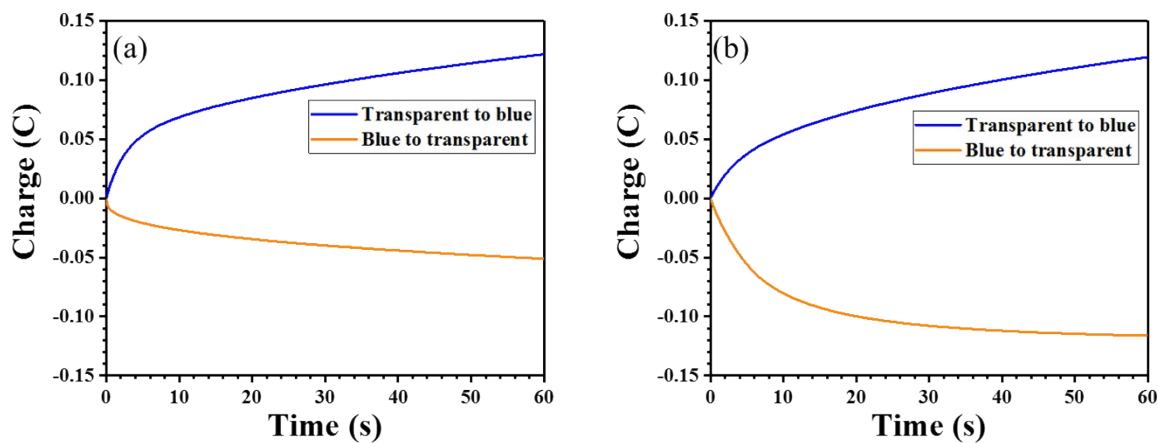

**[Figure S6]**

Figure S6 Multiple potential step measurements of  $\text{WO}_3$  thick film on ITO/glass. (a) As-prepared (not thermally treated), and (b) after thermal treatment at  $500\text{ }^\circ\text{C}$  for 1 h.

Table S1 Parameters for multiple potential step measurements.

|                           |      |
|---------------------------|------|
| First step potential (V)  | -1.2 |
| First step Time (S)       | 60   |
| Second step potential (V) | 1.0  |
| Second step Time (S)      | 60   |
| Quiet time (S)            | 10   |

Table S2 Coloration efficiency of WO<sub>3</sub> film on ITO/glass.

| WO <sub>3</sub> film conditions |                  | Coloration efficiency<br>□ Abs (670nm) / Charge (C) |
|---------------------------------|------------------|-----------------------------------------------------|
| Thickness (nm)                  | Treatment        |                                                     |
| 500                             | 500 °C for 1 h   | 8.91                                                |
| 2300                            | room temperature | 18.53                                               |
| 1200                            | 500 °C for 1 h   | 15.86                                               |

**[Figure S7]**

Figure S7 FE-SEM images of WO<sub>3</sub> films on ITO/glass substrates. (a) and (b): surface images before and after thermal treatment.

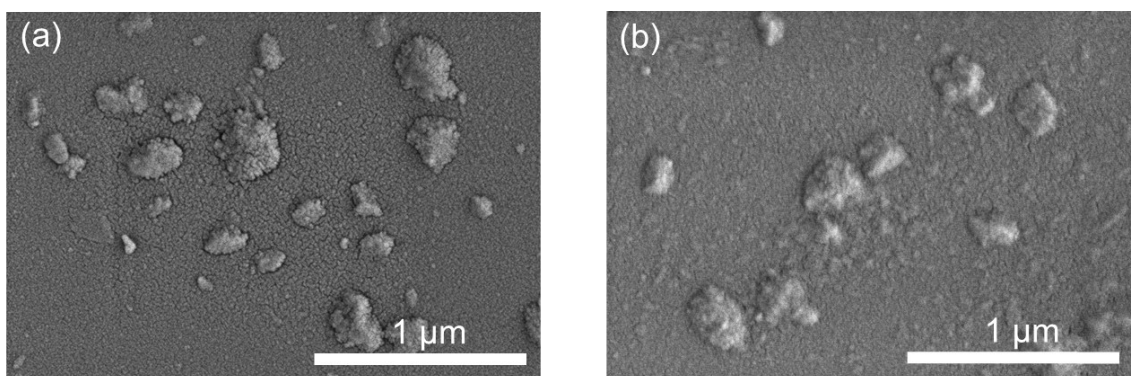

[Figure S8]

Figure S8 TG-DTA analysis of WO<sub>3</sub> slurry with PVA (5%).

Percentage relative to the total solid content, WO<sub>3</sub> : PVA : H<sub>2</sub>O = 26.5 : 1.3 : 72.2

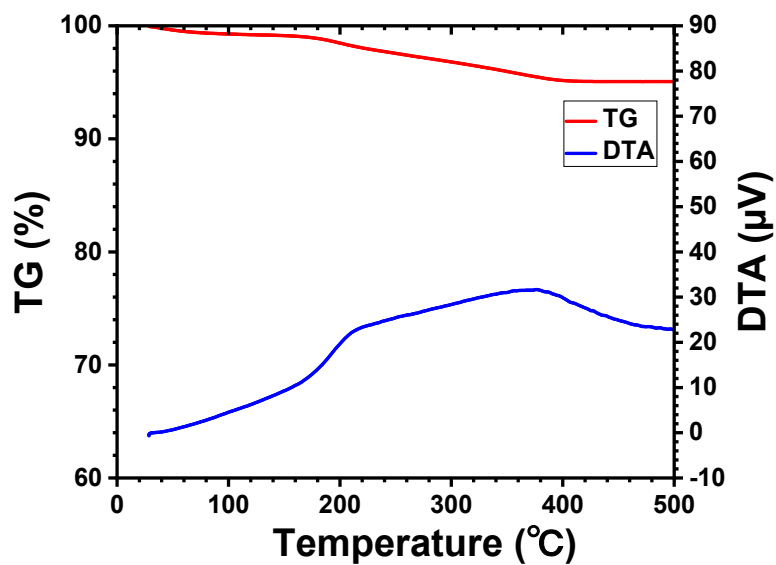

[Figure S9]

Figure S9 The durability of the electrochromic device.

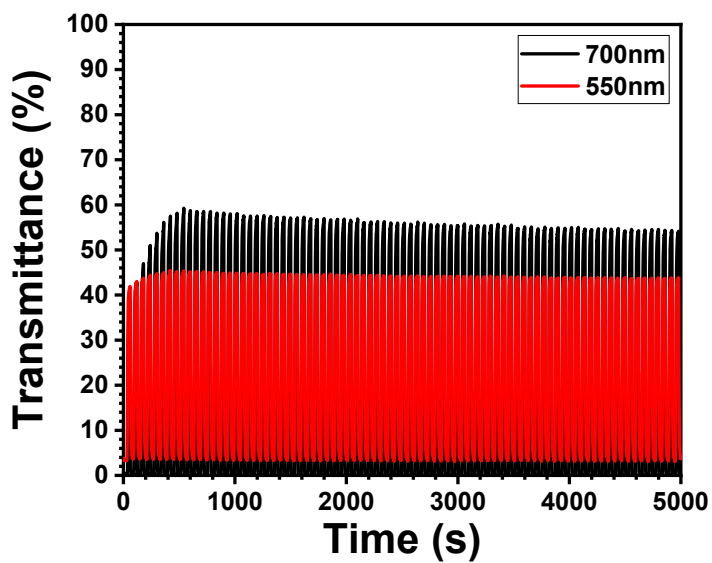

**[Figure S10]**

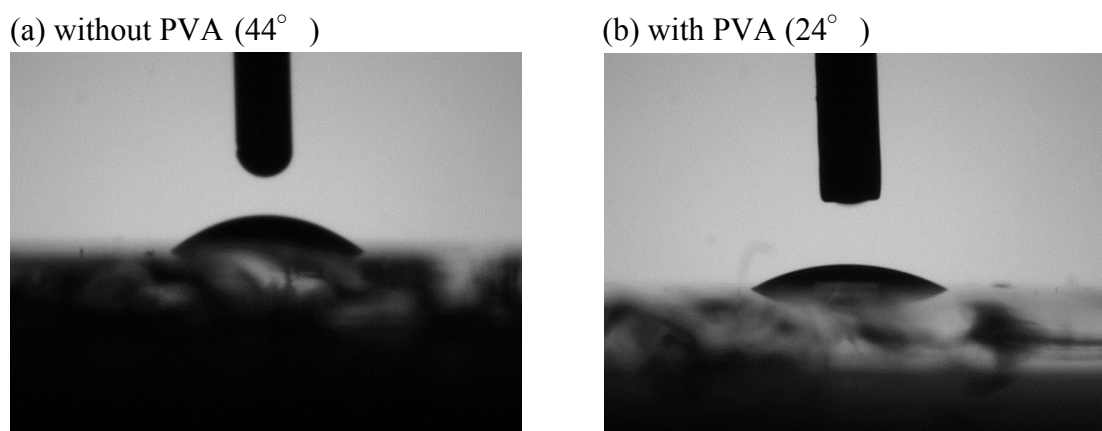

Figure S10 Wettability of the  $\text{WO}_3$  ink on ITO/glass substrate.

The wettability was evaluated by contact angle of the ink on the substrate.

**Table S3 Comparison of characteristics of various  $\text{WO}_3$  fabrication methods and performance of ECDs with  $\text{WO}_3$  and PB.**

| Starting materials                                 | Process / Synthesis                                                    | Product                                           | Coating method                                       | Transmittance (%)            |                               | Response time (s)       |              |
|----------------------------------------------------|------------------------------------------------------------------------|---------------------------------------------------|------------------------------------------------------|------------------------------|-------------------------------|-------------------------|--------------|
|                                                    |                                                                        |                                                   |                                                      | Transparent state            | Coloured state                | Transparent to colloerd |              |
| W                                                  | plasma process in vacuum condition under $\text{Ar}/\text{O}_2$ gasses | $\text{WO}_3$ NP                                  | spin-coating                                         | 64(at 670nm)<br>40(at 500nm) | 0.1(at 670nm)<br>10(at 500nm) | 3                       | In this work |
| $\text{WO}_3$                                      | thermal evaporation                                                    | $\text{WO}_3$                                     | vacuum-deposition                                    | 22(at 670nm)<br>61(at 500nm) | > 1(at 670nm)<br>25(at 500nm) | 45                      | ref.37       |
| $\text{WCl}_6$                                     | Solvothermal                                                           | $\text{W}_{18}\text{O}_{49}$ nanowire             | immersed into the reaction solution                  | 59(at 670nm)<br>68(at 500nm) | > 1(at 670nm)<br>28(at 500nm) | 100                     | ref.38       |
| W                                                  | electrodeposition in $\text{H}_2\text{O}_2$ solution                   | $\text{WO}_3$                                     | electrodeposition in $\text{H}_2\text{O}_2$ solution | N.D.                         | N.D.                          | N.D.                    | ref.39       |
| $\text{Na}_2\text{WO}_4 \cdot 2\text{H}_2\text{O}$ | immersed into the reaction solution                                    | $\text{WO}_3 \cdot \text{H}_2\text{O}$ nanosheets | immersed into the reaction solution                  | 70(at 670nm)<br>71(at 500nm) | 12(at 670nm)<br>34(at 500nm)  | 2                       | ref.40       |
